# Supplementary material
Source: publisher figshare collection journal article supplement (https://frontiersin.figshare.com/ndownloader/files/15250190)
Supplement: Supplementary file 1 [file 15250190]

## Sheet: Foglio1
Table S1 - Major and trace element compositions of late Cadomian granites (now augen gneisses), late Variscan granites and paragneisses from the Aspromomonte Massif and the northern Peloritani Mountains
Sample	Rock type	Ref	SiO2	TiO2	Al2O3	FeOt	MnO	MgO	CaO	Na2O	K2O	P2O5	LOI	Tot	Sr	V	Cr	Co	Ni	Zn	Rb	Y	Zr	Nb	Ba	La	Ce	Pr	Nd	Sm	Eu	Gd	Tb	Dy	Ho	Er	Tm	Yb	Lu	Th
FIU8	Augen gneiss	1	67.995	0.749	15.049	4.19012	0.055	1.969	1.679	2.898	4.053	0.094	0.75	99.4811	293.627	85.8598	37.7509	1.36761	12.4628	74.8877	97.0749	38.1205	332.436	22.2002	924.862	28.0903	45.305													8.27039
FIU11-B	Augen gneiss	1	66.137	0.864	15.085	4.60486	0.066	2.796	1.254	2.328	5.438	0.119	0.74	99.4319	262.705	92.7428	61.8419	8.41642	19.4211	50.226	93.3599	30.4087	270.563	16.8329	384.554	35.0948	78.3791													27.4375
FIU14	Augen gneiss	1	66.418	0.928	14.835	5.11661	0.074	2.848	1.672	3.207	3.089	0.089	1.09	99.3666	203.165	162.229	117.353	14.3295	48.5985	59.6773	103.602	36.1824	203.366	13.5309	567.478	18.0137	51.1385													11.4352
FIU15	Augen gneiss	1	66.26	0.827	15.142	4.70988	0.059	2.705	1.654	2.738	4.371	0.12	0.83	99.4159	157.525	85.7988	38.3702	8.25316	10.6628	27.956	76.018	28.3533	211.577	12.7606	476.004	20.0638	65.3722													18.0663
SAL1	Augen gneiss	1	70.598	0.563	14.395	3.15683	0.044	1.136	1.255	2.798	4.927	0.108	0.63	99.6108	215.258	84.5341	42.9469	5.8231	16.6908	47.6945	97.7369	20.2767	193.643	10.5549	903.468	21.6213	74.2579													15.8517
SAL2	Augen gneiss	1	72.812	0.421	13.972	2.32557	0.034	0.67	0.919	2.669	5.392	0.059	0.44	99.7136	86.7104	40.892	16.327	4.23464	6.88358	31.4552	178.444	35.9359	136.827	12.0548	487.973	16.2901	58.3508													16.2708
CA1	Augen gneiss	1	70.222	0.575	15.05	3.10343	0.041	0.98	1.27	2.846	4.534	0.086	0.91	99.6174	84.9224	33.0604	13.2213	1.36374	5.23897	22.6195	167.841	31.0135	103.257	7.00418	400.069	7.90386	47.0935													11.8904
CA2	Augen gneiss	1	69.921	0.549	15.359	2.86046	0.039	0.953	1.242	2.786	5.019	0.087	0.83	99.6455	110.473	44.4823	14.3546	2.42759	6.56974	34.9993	158.415	28.0795	150.149	9.25423	585.51	15.7179	52.5227													16.52
CA3	Augen gneiss	1	70.218	0.519	15.139	2.85067	0.041	0.879	1.279	2.804	4.955	0.093	0.87	99.6477	109.919	40.6737	15.9743	3.47661	7.91884	27.0825	145.33	21.6946	119.447	6.55251	636.181	17.0628	58.1493													13.9883
CA4	Augen gneiss	1	72.166	0.48	14.604	2.3674	0.019	0.986	1.083	4.48	2.64	0.053	0.83	99.7084	103.15	37.0258	14.3772	3.1346	5.50338	27.0488	155.283	26.1395	135.716	6.38743	615.712	22.2419	68.4707													15.2265
CA5	Augen gneiss	1	66.973	0.733	16.048	3.9338	0.054	1.499	1.38	2.62	5.087	0.107	1.08	99.5148	131.548	35.4907	12.191	6.22851	3.53169	18.0752	84.1016	26.9275	132.861	8.20797	335.752	14.2556	55.6967													15.1965
CA7	Augen gneiss	1	70.125	0.536	14.96	2.94501	0.043	1.087	1.24	2.684	5.128	0.098	0.79	99.636	95.9611	129.521	41.4072	16.3751	25.2096	121.643	340.063	31.2428	152.819	34.6765	155.822	8.85504	51.4878													11.4411
CA8	Augen gneiss	1	68.605	0.622	15.417	3.14259	0.044	1.48	1.21	2.544	5.72	0.109	0.72	99.6136	95.606	44.3176	15.6655	5.13066	7.95362	29.4586	160.718	28.377	144.084	7.65277	599.153	17.871	62.6571													16.3117
FIU11	Augen gneiss	2	69.05	0.6	14.42	3.5956	0.061	1.46	1.51	2.92	4.55	0.17	0.64	98.9766	184	69	40	9	-20	70	114	32	303	12	1241	50	100	12	39	8	1.4	7.3	1.1	5.7	1.1	3.1	0.4	2.4	0.3	22
G3	Augen gneiss	3	68.37	0.59	15.43	4.096	0.09	1.34	1.43	4.27	2.99	0.01	0.99	99.606
G5	Augen gneiss	3	69	0.55	14.89	4.101	0.07	1.42	1.44	3.58	3.25	0.01	1.2	99.511
G6	Augen gneiss	3	67.32	0.53	15.07	4.436	0.09	1.69	1.54	3.26	4.01	0.01	1.41	99.366
G13	Augen gneiss	3	66.56	0.64	15.13	5.113	0.1	1.54	1.75	3.42	3.77	0.02	1.5	99.543
G19	Augen gneiss	3	66.85	0.8	14.07	6.15	0.11	2.16	1.84	2.64	3.42	0.01	1.43	99.48
G29	Augen gneiss	3	69.6	0.53	14.13	4.468	0.1	0.97	1.54	2.94	4.2	0.02	1.1	99.598
G31	Augen gneiss	3	68.25	0.66	14.28	4.645	0.1	1.37	1.28	2.5	5	0.02	1.44	99.545
G34	Augen gneiss	3	70.8	0.5	13.58	3.973	0.07	0.89	1.53	3.05	4.15	0.02	0.87	99.433
G38	Augen gneiss	3	67.61	0.51	14.82	4.464	0.09	1.25	1.45	3.23	4.72	0.03	1.23	99.404
G42	Augen gneiss	3	74.2	0.28	12.83	2.3	0.06	0.73	0.82	2.78	4.45	0	0.95	99.4
G43	Augen gneiss	3	69.3	0.54	14.26	4.178	0.07	1.31	1.47	3.57	3.53	0.02	1.13	99.378
G49	Augen gneiss	3	67.98	0.54	14.8	4.028	0.07	1.2	1.15	3.46	4.71	0.02	1.51	99.468
G52	Augen gneiss	3	67.18	0.4	16.02	3.943	0.1	1.44	1.86	3.22	4.09	0.02	1.26	99.533
G56	Augen gneiss	3	71.53	0.48	13.62	3.336	0.05	0.92	1.48	3.03	4.18	0.02	0.86	99.506
G58	Augen gneiss	3	69.5	0.53	14.18	4.119	0.06	1.22	1.72	2.99	4.26	0.02	0.87	99.469
G62	Augen gneiss	3	69.56	0.5	14.2	3.977	0.06	1.13	1.41	2.85	4.26	0.01	1.34	99.297
G68	Augen gneiss	3	67.7	0.63	14.8	4.622	0.08	1.36	2	3.05	4.04	0.02	1.1	99.402
G73	Augen gneiss	3	71.84	0.45	13.21	3.652	0.07	0.98	1.45	2.73	4.13	0.02	0.94	99.472
G77	Augen gneiss	3	71.12	0.44	13.89	3.216	0.04	0.87	1.5	2.96	4.5	0.01	0.87	99.416
G82	Augen gneiss	3	65.55	0.76	15.97	5.206	0.08	1.78	2.58	3.24	3	0.02	1.42	99.606
G83	Augen gneiss	3	73.85	0.34	13.17	2.225	0.03	0.64	1.08	2.13	5.33	0.01	0.82	99.625
G94	Augen gneiss	3	70	0.57	13.95	3.973	0.05	1.33	1.85	3.26	3.27	0.01	1.27	99.533
G95	Augen gneiss	3	70.26	0.55	13.65	4.061	0.03	1.19	1.4	3.09	3.68	0.02	1.29	99.221
G100	Augen gneiss	3	66.42	0.63	15.5	4.383	0.08	1.49	1.52	3.01	4.86	0.02	1.55	99.463
G107	Augen gneiss	3	69.6	0.53	14.35	3.752	0.04	1.16	1.54	2.65	4.83	0.02	1.13	99.602
VSG2	Granite	1	74.67	0.103	14.04	1.1926	0.032	0.28	1.08	3.42	3.71	0.21	0.87	99.6076	169.156	-5	-20	-1	-20	54.7435	139.007	11.071	63.7865	12.0085	520.018	21.0896	39.8006													6.36693
VSG3	Granite	1	74.12	0.113	14.34	1.335	0.041	0.31	1.18	3.65	3.58	0.19	0.8	99.659	190.316	-5	-20	1.13169	-20	62.4005	131.268	11.0284	65.253	11.2098	733.881	23.5047	44.3655													7.06885
VSG1	Granite	4	73.97	0.101	14.45	1.2015	0.034	0.28	1.09	3.7	3.87	0.2	0.81	99.7065	180.445	-5	-20	-1	-20	51.4125	133.808	10.1607	57.2072	10.2861	597.969	20.0113	37.9803	4.22	15.6	3.2	0.72	2.5	0.4	1.7	0.3	0.7	0.09	0.5	0.07	6.15437
CR3	Granite	5	67.35	0.26	18.02	2.4831	0.06	0.89	3.23	4.24	1.46	0.13	1.26	99.3831	616						56	13	160	11	1091	72	136													19.16
CR4	Granite	5	69.75	0.26	16.46	2.33892	0.06	0.77	2.68	4.02	1.62	0.12	1.33	99.4089	528						66	11	162	13	1309	67	122													17.44
CR6	Granite	5	71.81	0.17	16.13	1.51389	0.06	0.51	1.91	2.9	3.19	0.15	1.28	99.6239	426						99	11	108	9	1087	38	76													12.41
CR8	Granite	5	71.54	0.14	14.93	1.24956	0.04	0.41	1.44	3.01	3.28	0.23	1.59	97.8596	327						110	14	92	9	1152	33	66													9.55
CR9	Granite	5	73.19	0.16	15.66	1.61802	0.05	0.44	1.71	3.29	2.58	0.11	0.97	99.778	361						98	10	96	16	992	40	72													10.61
CR2	Granite	5	74.52	0.13	14.85	1.2015	0.05	0.33	1.23	2.78	3.47	0.15	1	99.7115	224						131	10	79	10	812	27	48													7.16
CR1	Granite	5	74.88	0.1	14.67	0.89712	0.04	0.25	1.35	3.2	3.41	0.1	0.86	99.7571	277						109	12	60	8	1243	20	40													9.35
CR84	Granite	5	75.33	0.1	14.09	0.98523	0.03	0.25	0.67	2.44	4.59	0.11	0.98	99.5752	151						115	16	62	10	1055	14	28													5.05
VSG131	Granite	5	70.1	0.24	15.89	2.41902	0.06	0.84	2.53	3.9	1.84	0.13	0.96	98.909	485						65	12	141	11	1175	69	133													17.47
VSG5	Granite	5	72.92	0.17	15.33	1.602	0.08	0.47	2.14	3.68	1.95	0.11	1.15	99.602	439						74	10	132	10	995	45	85													11.23
VSG4	Granite	5	73.78	0.13	14.32	1.06533	0.04	0.54	1.1	3.8	3.78	0.17	0.99	99.7153	237						100	11	98	14	1632	27	56													9.59
VSG43	Granite	5	74.96	0.09	14.35	0.86508	0.04	0.44	0.68	2.2	5.09	0.08	0.99	99.7851	169						127	20	47	8	893	15	30
11	Granite	6	72.94	0.16	14.57	2.2068	0.04	0.56	1.76	3.21	3.3	0.18	0.98	99.9068
12	Granite	6	72.36	0.19	15.31	1.7707	0.09	0.36	2.19	3.47	3.2	0.25	0.59	99.7807
19	Granite	6	71.87	0.15	15.14	1.4058	0.05	0.97	1.92	3.31	3.65	0.16	0.53	99.1558
23	Granite	6	71.64	0.29	15.24	1.2812	0.09	1.37	2.07	3.38	2.85	0.18	0.57	98.9612
40	Granite	6	71.94	0.26	14.94	1.6016	0.05	0.86	1.89	3.48	2.95	0.14	0.87	98.9816
41	Granite	6	75.58	0.16	12.34	1.744	0.06	0.46	0.73	4.05	3.49	0.14	1.04	99.794
43	Granite	6	74.91	0.19	13.64	1.3613	0.05	0.44	0.87	2.83	4.77	0.12	0.62	99.8013
55	Granite	6	72.39	0.24	15.01	1.7618	0.06	0.62	1.54	3.58	3.27	0.24	1.07	99.7818
64	Granite	6	73.92	0.18	13.89	1.4325	0.03	0.26	1.15	3.42	4.96	0.22	0.49	99.9525
70	Granite	6	74.89	0.23	14.27	1.299	0.03	0.22	1.26	4.53	3.06	0.03	0.66	100.449
105	Granite	6	70.88	0.18	15.98	1.5304	0.03	0.75	2.05	3.67	2.75	0.14	0.98	98.9404
117	Granite	6	70.97	0.27	15.63	1.3791	0.07	1.05	2.19	3.55	2.65	0.21	0.93	98.8991
125	Granite	6	71.44	0.27	15.7	1.5393	0.07	0.5	2.75	3.59	2.06	0.06	0.98	98.9593
131	Granite	6	70.47	0.3	15.52	1.6906	0.05	0.81	2.97	3.7	2.05	0.14	0.96	98.6606
261	Granite	6	72.52	0.2	14.94	1.2189	0.03	0.61	1.82	3.75	3.08	0.28	0.68	99.1289
267	Granite	6	72.6	0.17	14.94	1.2367	0.05	0.48	1.91	3.67	3.3	0.15	0.68	99.1867
276	Granite	6	72.6	0.24	14.78	1.2456	0.05	0.64	2.24	3.79	2.25	0.13	1.08	99.0456
281	Granite	6	71.13	0.27	15.45	1.3613	0.08	0.7	2.44	3.54	2.6	0.24	0.86	98.6713
9	Granite	7	72.79	0.18	15.36	1.8597	0.03	0.69	1.98	3.52	2.4	0.1	0.81	99.7197
51	Granite	7	73.86	0.16	14.7	1.922	0.03	0.57	1.4	3.03	3.43	0.15	0.77	100.022
54	Granite	7	73.95	0.11	14.86	1.744	0.04	0.55	0.95	3.6	3.88	0.13	0.58	100.394
60	Granite	7	74.96	0.07	15.12	1.6105	0.05	0.46	0.95	2.92	3.07	0.17	1.03	100.41
80	Granite	7	72.69	0.31	14.15	1.6283	0.03	1.15	1.12	2.85	4.26	0.18	0.64	99.0083
84	Granite	7	73.67	0.19	14.42	1.8775	0.04	0.63	0.78	2.92	4.7	0.15	0.76	100.138
184	Granite	7	71.86	0.4	15.02	1.3969	0.03	0.9	1.51	4.17	3.86	0.19	0.28	99.6169
185	Granite	7	73	0.25	15.74	1.3702	0.3	0.75	2.19	4.25	2.32	0.12	0.17	100.46
189	Granite	7	68.94	0.31	16.79	1.8063	0.04	1.07	3.08	3.82	1.73	0.16	0.68	98.4263
194	Granite	7	74.25	0.1	14.93	1.4681	0.03	0.43	1.07	3.27	3.9	0.15	0.39	99.9881
GC 6	Paragneiss	8	58.75	0.791	19.36	6.4525	0.078	3.13	0.83	1.7	4.11	0.23	3.66	99.0915	145	127	97	12	21	90	138	32.7	179	13.7	755	44.5	85.4	10.1	38.2	7.62	1.47	7	1.07	6.01	1.13	3.31	0.49	3.15	0.443	12.4
GC 13	Paragneiss	8	72.25	0.641	12.43	4.3966	0.072	2.02	2.06	2.71	1.55	0.22	1.4	99.7496	248	88	93	14	78	74	183	29.9	217	10.5	919	32.9	63.2	7.26	28	5.53	1.3	5.2	0.87	5.17	1.03	3.21	0.48	3.2	0.441	8.65
GC 15	Paragneiss	8	70.55	0.741	12.82	4.6636	0.092	2.21	2.14	2.93	1.99	0.27	1.17	99.5766	200	102	81	14	26	73	110	30.8	217	9.8	1010	34.2	67.3	7.73	29.7	5.84	1.45	5.49	0.9	5.33	1.03	3.14	0.449	2.99	0.43	9.55
GC 24	Paragneiss	8	63.76	0.854	15.47	5.4201	0.077	2.82	2.59	3.54	2.19	0.22	1.26	98.2011	264	109	93	16	30	57	97	32.2	234	13.9	741	36.9	75	8.61	33.2	6.63	1.6	6.1	0.97	5.59	1.11	3.3	0.483	3.22	0.478	10.1
GC 28	Paragneiss	8	63.75	1.017	14.69	6.4703	0.108	3.47	3.18	2.45	2.31	0.24	1.3	98.9853	295	125	91	18	44	74	109	32.4	231	11.6	603	40.2	79.7	9.04	34.9	6.62	1.48	6	0.94	5.53	1.09	3.43	0.505	3.34	0.492	11.9
GC 33	Paragneiss	8	62.06	1.598	14.9	6.8174	0.094	2.96	4	2.06	1.82	0.35	1.86	98.5194	319	124	42	17	-15	61	90	28.5	234	30.6	511	37.9	76.1	8.72	35	6.97	2.19	6.61	1.01	5.63	1.03	2.92	0.407	2.55	0.36	7.83
GC 35	Paragneiss	8	54.97	1.603	15.88	8.4194	0.123	4.4	4.48	2.44	2.01	0.3	2.86	97.4854	267	153	79	25	30	107	80	30.8	265	36.1	469	44.3	85.2	10	39.1	7.55	2.17	7	1.09	6	1.11	3.12	0.424	2.9	0.398	9.62
GC 39	Paragneiss	8	72.72	0.647	12.07	4.1385	0.133	1.95	2.26	2.56	1.48	0.17	0.9	99.0285	205	89	78	11	27	49	76	28.8	274	10.4	573	37.7	73.1	8.14	31.6	6.04	1.38	5.53	0.9	5.14	0.99	3.05	0.469	3.02	0.43	11.6
GC 48	Paragneiss	8	69.46	0.661	13.47	4.6725	0.125	1.99	2.76	2.77	1.62	0.37	0.94	98.8385	190	88	83	15	35	68	95	31.2	265	11.7	795	43	140	8.98	33.1	6.28	1.36	4.8	0.94	5.41	1.07	3.13	0.488	3.22	0.464	12.5
GC 50	Paragneiss	8	64.65	0.967	13.35	6.9242	0.134	3.54	1.75	2.13	3.28	0.17	1.29	98.1852	257	110	91	19	23	49	163	26.4	198	7.5	856	34.2	66.4	7.44	27.5	4.6	0.723	3.43	0.56	3.91	0.93	3.09	0.497	3.43	0.519	9.03
ct06	Paragneiss	9	62.8	0.706	15.91	5.8829	0.083	3.05	2.22	2.72	2.93	0.19	1.54	98.0319	227	120	86	17	48	58	123	28.7	150	11.6	561	31	65	6.92	27	5.56	1.43	5.11	0.84	4.74	0.92	2.67	0.357	2.39	0.348	9.42
ct08	Paragneiss	9	59.95	0.854	19.07	6.7818	0.183	2.15	1.06	2.43	3.9	0.16	1.94	98.4788	185	134	94	20	45	87	171	35	164	16.6	487	47.9	98.5	10.4	38.5	7.3	1.8	6.28	1.04	5.83	1.13	3.4	0.486	3.31	0.465	15.2
ct12	Paragneiss	9	58.68	1.106	22.15	8.4639	0.177	2.66	0.46	0.6	2.74	0.2	1.88	99.1169	40	176	128	25	57	116	270	46.6	229	22.2	470	59	120	12.8	48.4	8.98	1.57	7.99	1.35	7.91	1.53	4.77	0.684	4.52	0.645	18.7
ct21	Paragneiss	9	64.22	0.792	16.37	5.7939	0.096	2.48	2.36	2.45	2.99	0.16	2.18	99.8919	208	121	85	15	36	52	130	35.1	180	13.1	596	40.9	84.2	8.86	34.5	6.73	1.58	5.82	1.02	5.77	1.14	3.37	0.516	3.44	0.497	13
ct22	Paragneiss	9	63.44	0.783	15.48	5.8117	0.11	3.46	2.63	2.81	2.57	0.22	1.1	98.4147	231	124	120	19	83	90	121	32.9	218	15.6	648	40.4	81.6	8.63	33	6.23	1.46	5.78	0.95	5.29	1.04	3.1	0.436	2.91	0.421	14.7
ct24	Paragneiss	9	62.68	0.751	16.28	5.4735	0.104	2.95	1.7	3.1	3.32	0.19	1.92	98.4685	274	133	90	15	31	86	121	33.6	177	11.6	976	35.8	71.6	7.91	31.3	6.39	1.49	5.64	0.95	5.51	1.06	3.18	0.454	3.01	0.43	9.54
ct25	Paragneiss	9	67.57	0.748	15.37	5.0463	0.058	1.5	1.87	3.05	2.63	0.27	1.52	99.6323	151	72	47	11	24	81	108	48.7	255	15	741	40.7	85.3	9.47	37.3	7.62	1.25	7.54	1.32	7.8	1.53	4.67	0.668	4.31	0.608	14.6
ct26	Paragneiss	9	60.05	0.873	19.38	6.7551	0.09	2.1	1.08	1.77	3.13	0.12	2.58	97.9281	145	135	97	17	41	51	122	35.8	184	17.9	695	50.6	102	10.9	40.5	7.28	1.74	6.26	1.02	5.76	1.14	3.51	0.498	3.27	0.469	15.6
References
1: This study
2: Fiannacca, P., Williams, I. S., Cirrincione, R., and Pezzino, A. (2013). The augen gneisses of the Peloritani Mountains (NE Sicily): granitoid magma production during rapid evolution of the northern Gondwana margin at the end of the Precambrian. Gondwana Res. 23, 782–796. doi: 10.1016/j.gr.2012.05.019.
3: Atzori, P., Lo Giudice, A., 1982. Gli gneiss occhiadini del messinese: caratterizzazione geopetrografica e petrochimica. Periodico di Mineralogia 51, 51–74.
4:Fiannacca, P., Williams, I.S., Cirrincione, R., and Pezzino, A. (2008). Crustal contributions to late Hercynian peraluminous magmatism in the southern Calabria–Peloritani Orogen, southern Italy: petrogenetic inferences and the Gondwana connection. J. Petrol. 49, 1497–1514. doi:10.1093/petrology/egn035.
5: Rottura, A., Caggianelli, A., Campana, R., and Del Moro, A. (1993). Petrogenesis of Hercynian peraluminous granites from the Calabrian Arc, Italy. Eur. J. Mineral. 5, 737–754. doi: 10.1127/ejm/5/4/0737.
6: Messina A., Rottura A., and Russo S. (1974). Le leucogranodioriti muscovitiche dell’entroterra di Villa S. Giovanni (Reggio Calabria). Per. Mineral. 43, 51–92.
7: Puglisi G., Rottura A., 1973. Le leucogranodioriti muscovitiche della zona di Capo Rasocolmo. (Messina). Per. Mineral. 42, 207–256.
8: Fiannacca, P. (2000). Petrologia dei corpi leucocratici a plagioclasio dei Peloritani nord-orientali (Sicilia nord-orientale). PhD thesis, University of Catania.
9: Atzori P., Cirrincione R., Hartmut K., Mazzoleni P., Pezzino A., Puglisi G., Punturo R., and Trombetta A. (2004). The abundance of 53 elements and petrovolumetric models of the crust in north-eastern Peloritani Mountains (site 8). In: “The abundance of 55 elements and petrovolumetric models of the crust
in 9 types areas from the crystalline basements of Italy, with some geophysical and petrophysical data”. In Sassi, F.P. (Ed.), Rome. Accademia Nazionale delle Scienze detta dei XL 32, 319–371.
